# Supplementary material for: RADIA: RNA and DNA Integrated Analysis for Somatic Mutation Detection
Source: PubMed Central journal article supplement (PMC4236012; doi:10.1371/journal.pone.0111516), 2014-11-18
Supplement: pone.0111516.s005.pdf [file pone.0111516.s005.pdf]

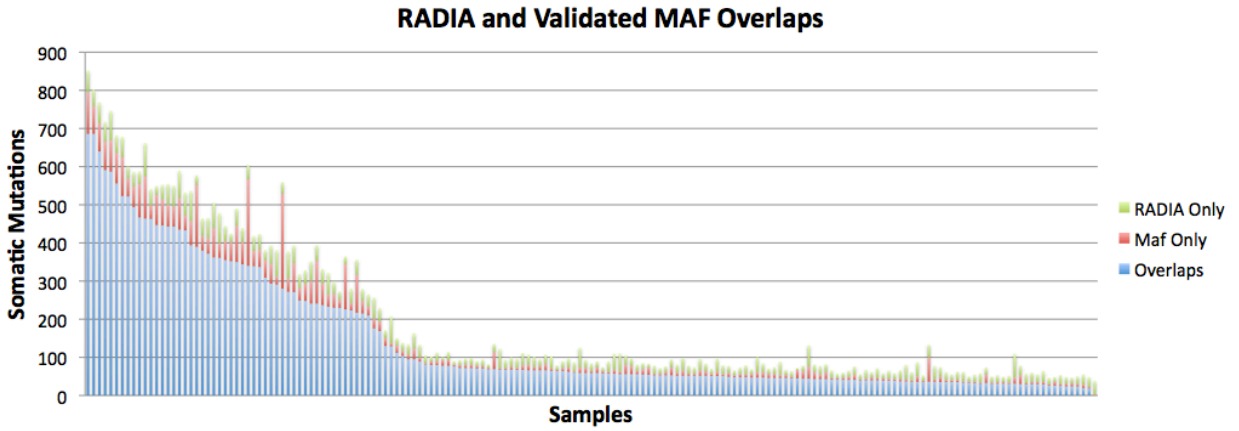

**Figure S5: Distribution of overlaps between RADIA and the endometrial TCGA MAF file.** The distribution of the overlaps between RADIA and the validated somatic mutations from the endometrial TCGA network MAF file.
