# Supplementary material for: RADIA: RNA and DNA Integrated Analysis for Somatic Mutation Detection
Source: PubMed Central journal article supplement (PMC4236012; doi:10.1371/journal.pone.0111516), 2014-11-18
Supplement: pone.0111516.s006.pdf [file pone.0111516.s006.pdf]

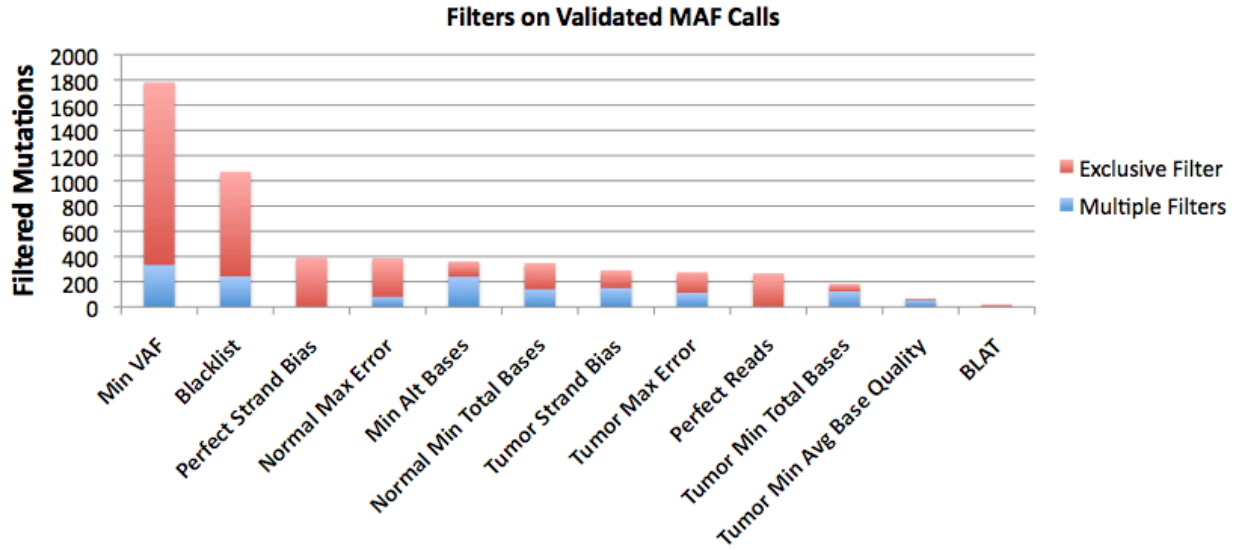

**Figure S6: Filters applied to the RADIA mutations that validated as somatic in the endometrial TCGA MAF file.** Thirty-three percent of the mutations had a DNA VAF of eight percent or less while 23% landed in blacklist regions that were ignored.
