# Supplementary material for: RADIA: RNA and DNA Integrated Analysis for Somatic Mutation Detection
Source: PubMed Central journal article supplement (PMC4236012; doi:10.1371/journal.pone.0111516), 2014-11-18
Supplement: pone.0111516.s007.pdf [file pone.0111516.s007.pdf]

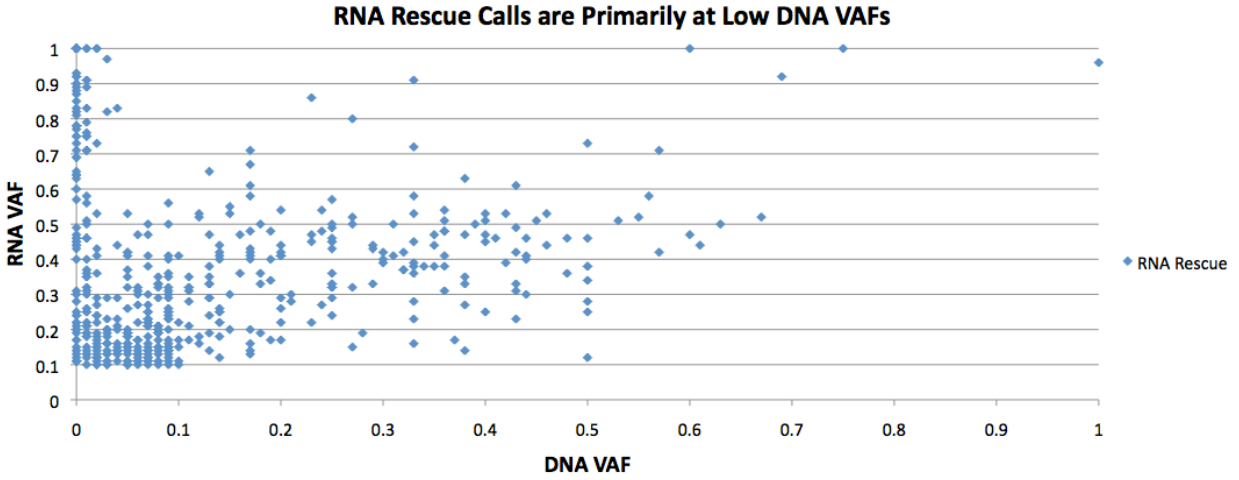

**Figure S7: RNA Rescue calls are primarily at low DNA VAFs.** RNA Rescue calls are primarily found at low DNA variant allele frequencies, but they also occur at higher frequencies where they were filtered due to non-depth related artifacts (e.g. strand-bias).
